# Supplementary material
Source: ML conference proceedings conference paper supplement (https://openaccess.thecvf.com/content/WACV2024/html/Kim_LensNeRF_Rethinking_Volume_WACV_2024_paper.html)
Supplement: Supplementary file 1 [file Kim_LensNeRF_Rethinking_Volume_WACV_2024_supplemental.zip]

## Supplemental Material

This supplemental material includes additional details and experimental results about our LensNeRF and the baselines. In Sec. I, we illustrate the procedure of how we obtained  $t^{(foc)}$  used for the in-focus loss. Sec. II details the ray undistortion procedure that we exploit via pseudo-code. Further details on how we perform the evaluations using the baseline methods are described in Sec. III. We explain dataset properties in Sec. IV through sample images. Additional qualitative and quantitative results are enumerated in Sec. V.

### I. Additional Details of In-Focus Loss

**In-focus point sampling factor.** This part elaborates on how we obtain  $t^{(foc)}$  in Eq. (11).  $t^{(foc)}$  is a scalar value that makes the sampled point to be on the in-focus plane satisfying

$$\mathbf{x}^{(foc)} = \mathbf{o}' + t^{(foc)} \mathbf{d}', \quad (14)$$

where  $\mathbf{o}'$  is a ray origin in the normalized device coordinate (NDC) space and  $\mathbf{d}'$  is a ray direction in the NDC space. To find  $t^{(foc)}$ , we first find the point where all the rays converge in the non-NDC space and then convert it to the NDC space, *i.e.*,

$$\pi(\mathbf{o} + t_{pre}^{(foc)} \mathbf{d}) = \mathbf{o}' + t^{(foc)} \mathbf{d}' \quad (15)$$

$$\mathbf{d} = \frac{\mathbf{r}_{out}^{(i,j)}}{\|\mathbf{r}_{out}^{(i,j)}\|}, \quad (16)$$

where  $\pi$  projects ray origin  $\mathbf{o}$  and direction  $\mathbf{d}$  in non-NDC space to ray origin  $\mathbf{o}'$  and direction  $\mathbf{d}'$  in NDC space. The  $\mathbf{r}_{out}^{(i,j)}$  is a ray contributes to the pixel  $\mathbf{p}_i$ , originating from  $\mathbf{o}_j$  as depicted in Fig. 4. Connection between  $t^{(foc)}$  and  $t_{pre}^{(foc)}$  is described in NeRF [4] as

$$t^{(foc)} = 1 - \frac{o_z}{o_z + t_{pre}^{(foc)} d_z}. \quad (17)$$

We adapt Eq. (17) to convert  $t_{pre}^{(foc)}$  in non-NDC space to  $t^{(foc)}$  in NDC space.

To derive  $t_{pre}^{(foc)}$  of a ray passing through the lens center, contributing to the pixel  $\mathbf{p}_i$ , we investigate the point where all the rays in  $\mathcal{R} = \{\mathbf{r}_{out}^{(i,j)} | j \in \mathcal{J}\}$  intersect. Here,  $j \in \mathcal{J} = \{0, 1, \dots, N_o - 1\}$  is the index of ray origin on the thin-lens surface and  $i$  is the pixel index of our interest. It is already known that when two rays are defined as  $\mathbf{r}_1 = \mathbf{o}_1 + t_1 \mathbf{d}_1$  and  $\mathbf{r}_2 = \mathbf{o}_2 + t_2 \mathbf{d}_2$ , the value of  $t_1$  that minimizes the distance between the two lines can be calculated as follows [1].

$$t_1^* = \frac{\mathbf{f}(\mathbf{r}_1(\mathbf{o}_1, \mathbf{d}_1), \mathbf{r}_2(\mathbf{o}_2, \mathbf{d}_2))}{\frac{(\mathbf{o}_2 - \mathbf{o}_1) \cdot (\mathbf{d}_2 \times (\mathbf{d}_2 \times \mathbf{d}_1))}{\mathbf{d}_1 \cdot (\mathbf{d}_2 \times (\mathbf{d}_2 \times \mathbf{d}_1))}}. \quad (18)$$

Assume that the ray passing through the lens center is a reference ray  $\mathbf{r}_1$ . Then the point where all the other rays converge is  $\mathbf{o}_1 + t^{(foc)} \mathbf{d}_1$ . From this,  $t^{(foc)}$  of  $i$ 'th pixel can be simply defined as

$$t^{(foc)} = \frac{\sum_{j \in \mathcal{J}, \mathbf{o}^{(c)} \neq \mathbf{o}_j} \mathbf{f}(\mathbf{r}_1(\mathbf{o}^{(c)}, \mathbf{r}_{in}^{(i)}), \mathbf{r}_2(\mathbf{o}_j, \mathbf{r}_{out}^{(i,j)}))}{|\mathcal{J}| - 1}, \quad (19)$$

where  $\mathbf{o}^{(c)}$  is the lens center. Note that  $\mathbf{r}_{in}^{(i)}$  is the same as  $\mathbf{r}_{out}^{(i,c)}$ , when  $c$  is the index of ray origin at lens center.

### II. Ray Undistortion

To find accurate  $t^{(foc)}$ , rays are undistorted using distortion parameters obtained from calibration. The following shows the pseudo-code of the ray undistortion procedure. Here,  $k_1, k_2, p_1, p_2$  are radial distortion parameters,  $\mathbf{r}_d$  is an initial distorted ray, and  $\lambda_t$  is a hyper-parameter with the value of  $1e-5$

---

#### Algorithm 1 Ray Undistortion

---

```

1: function UNDISTORT( $\mathbf{r}_d, k_1, k_2, p_1, p_2$ )
2:   function DISTORT( $x, y, k_1, k_2, p_1, p_2$ )
3:      $R \leftarrow x^2 + y^2$ 
4:      $D \leftarrow 1 + k_1 R + k_2 R^2$ 
5:      $x_d \leftarrow Dx + 2p_1 xy + p_2(R + 2x^2)$ 
6:      $y_d \leftarrow Dy + p_1(R + 2y^2) + 2p_2 xy$ 
7:     return  $[x_d, y_d, -1]$ 
8:   end function
9:    $\mathbf{r}_u \leftarrow \mathbf{r}_d$ 
10:  while True do:
11:     $\mathbf{e} \leftarrow \text{DISTORT}(\mathbf{r}_u[0], \mathbf{r}_u[1], k_1, k_2, p_1, p_2) - \mathbf{r}_d$ 
12:     $\mathbf{r}_u \leftarrow \mathbf{r}_u - \mathbf{e}$ 
13:    if  $|\mathbf{err}| \leq \lambda_t$  then
14:      break
15:    end if
16:  end while
17:  return  $\mathbf{r}_u$ 
18: end function

```

---

### III. Description of Baseline Methods

**DiskBlur+DVGO.** The objective of novel view synthesis with defocus blur is synthesizing images with a small F-number, given in-focus images only. A simple yet naive way to achieve this goal is to directly train the NeRF architecture using synthetically blurred input images. To accomplish this, we first convert sharp images into blurry images that are as similar as possible to those captured using the target F-number. Referring to RawNeRF [3] and Srinivasan *et al.* [6], we first train DVGO using sharp images and apply

| TL-NeRF Dataset |               |                            |                   |                 |
|-----------------|---------------|----------------------------|-------------------|-----------------|
| Scene Index     | Scene Name    | #Views<br>(for each F-num) | F-nums            | #Images (Total) |
| 1               | AmusementPark | 34                         | F4, F5.6, F8, F22 | 136             |
| 2               | AppleMint     | 40                         | F4, F5.6, F8, F22 | 160             |
| 3               | Bear          | 42                         | F4, F5.6, F8, F22 | 168             |
| 4               | BoyAndGirl    | 29                         | F4, F5.6, F8, F22 | 116             |
| 5               | Chrysanthemum | 44                         | F4, F5.6, F8, F22 | 176             |
| 6               | Gink          | 50                         | F4, F5.6, F8, F22 | 200             |
| 7               | Sheep         | 47                         | F4, F5.6, F8, F22 | 188             |
| 8               | Snowman       | 39                         | F4, F5.6, F8, F22 | 156             |
| 9               | Xmas          | 47                         | F4, F5.6, F8, F22 | 188             |

Table 6. Dataset configuration.

disk kernel on Multi-Plane Image(MPI) defined in neural radiance fields (depth-wise manner). The disk kernel size  $d_i$  for each plane is defined as follows:

$$d_i = \text{round} \left( \frac{c}{\text{F-number}} |i - i_f| \right) \quad (20)$$

$$d_i += ((d_i + 1) \% 2), \quad (21)$$

where  $i$  is the index of a plane,  $i_f$  is the index of an in-focus plane,  $d_i$  is the disk kernel size of the plane with index  $i$ , and  $c$  is the hyper-parameter. Note that as the difference between the  $i$  and  $i_f$  gets bigger, disk kernel size  $d_i$  gets larger, which makes sense since the point far from the in-focus plane is more blurry compared to the one near the in-focus plane. To get final blurry train images, a conventional volume rendering scheme is applied on blurred MPI. Although access to the images with target F-number is not allowed in usual cases, to be generous to our baseline, we peek at a single image with the target F-number that matches the viewpoint of the selected train image. And then, we perform the grid search over hyper-parameter  $c$  that minimizes the difference between the peeked image with the target F-number and the synthetic blurry image generated from the selected train image. Synthetic blurry images generated from train images are used to train DVGO. After training, novel view images are created by volume rendering scheme and utilized for the evaluation in Sec. 5.3.1, with a name of ‘DiskBlur+DVGO’.

The first row of the Fig. 7 shows the sampled train images used for the DiskBlur+DVGO and our method. See how the train image domain of the DiskBlur+DVGO is similar to that of the ground-truth test image domain. Even with such a similarity, the baseline model fails to employ given blur information to novel view, while our LensNeRF can generate a novel view image similar to the ground-truth image without blur prior.

**NeRFocus.** Given all-in-focus images as a train set, NeRFocus [8] synthesizes novel view defocus images using

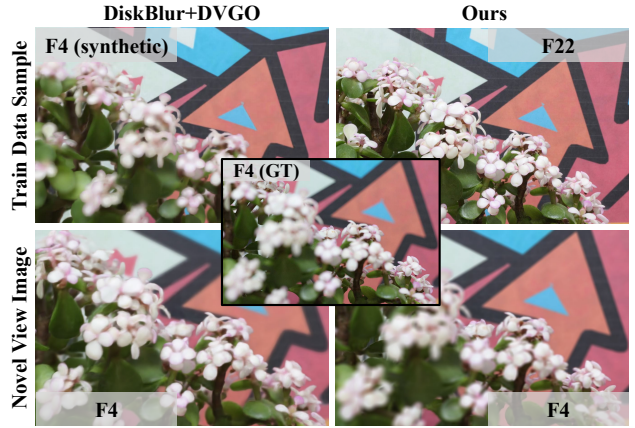

Figure 7. Train, test, and synthesized image samples in novel view defocus task.

NeRF framework. They define a parameter  $A'$  in relative scale and manipulate aperture size by adjusting it. All-in-focus image is obtained when  $A'$  has the value of 0.

Similar to DiskBlur+DVGO evaluation case, we peek at a single ground-truth wide-aperture image that corresponds to one of the train images with a narrow aperture. And then, we conduct the grid search over  $A'$  to find the value that explains a referenced ground-truth image the best. Starting from 0, the parameter value is increased by the amount of 0.005. We do early stopping when the mean square error between two images increases for five steps and keep the best performing  $A'$ . Defocus images synthesized by NeRFocus [8] are used for evaluation in Sec. 5.3.1.

**DoF-NeRF.** Unlike other baseline methods, DoF-NeRF [9] is not only capable of training NeRF using defocus images but also able to adjust aperture size for novel-view synthesis. DoF-NeRF defines two parameters for each viewpoint, which are the aperture parameter  $\mathcal{K}$  and focus distance  $\mathcal{F}$ . Here,  $\mathcal{K}$  is defined as the multiplication of focal

length and aperture diameter,  $\mathcal{K} = f \times D$ . To evaluate DoF-NeRF, we need to estimate parameters  $\mathcal{K}$  and  $\mathcal{F}$  for the target F-number. We estimate them, we first train DoF-NeRF with the target F-number images and average  $\mathcal{K}$ s and  $\mathcal{F}$ s for all views. Estimated parameters  $\mathcal{K}$  and  $\mathcal{F}$  are used for novel view synthesis, having the same value regardless of its viewpoint. For instance, for defocus task that is trained on F22 images and aims to render F4 images, we train DoF-NeRF using F4 images and average out the estimated parameters  $\mathcal{K}$  and  $\mathcal{F}$  for all views. Then use these estimated parameters for target-view F4 image rendering. Since the aperture size, image focal length, and lens focal length are fixed for each scene with the same F-number in our dataset, the average operation is a reasonable approach rather than a rough assumption. Since DoF-NeRF provide only a fraction of the code, omitting the files for the training and rendering, we complete the code based on the details from the DoF-NeRF paper and use it for our evaluation.

## IV. Dataset overview

As stated in Sec. 5.1, to rigorously evaluate our proposed method, we construct a dataset of nine scenes for novel view synthesis task with varying aperture sizes. Each scene consists of images taken from different viewpoints. For each viewpoint, we collect four images with different F-numbers, which are F4, F5.6, F8, and F22. To preclude unwanted external force on the camera, we change the F-number remotely using the software supported by Canon, so that we can capture an image without pressing the button on the camera. Tab. 6 shows the overall structure of our proposed dataset, consisting of 1488 images in total. Every 8th viewpoint is selected as a test set. All baseline methods are trained for each scene from scratch. Sampled images of the given F-number and the given scene can be found in Fig. 8.

## V. Additional Experimental Results

Here, we introduce additional experimental results. The brightness of the resulting images is adjusted for ease of comparison. In cases where the F-numbers in the training dataset are inhomogeneous, we employ the ‘Fmix’ notation. To generate the Fmix dataset, we interleave F-numbers sequentially for every viewpoint, for instance, an image with F-number 4 is selected for the first viewpoint, an image with F-number 5.6 is selected for the second viewpoint, an image with F-number 8 is selected for the third viewpoint, an image with F-number 22 is selected for the fourth viewpoint, and an image with F-number 4 is selected for the fifth viewpoint, and so on.

**The Number of Outer Loops** Tab. 7 shows the effect of increasing the number of outer loops  $N_{\text{outer}}$ . Raising the  $N_{\text{outer}}$  value gives better results until it reaches the value of

| Deblur Task     |                    | PSNR $\uparrow$      | SSIM $\uparrow$ | LPIPS $\downarrow$ | DISTS $\downarrow$ | AGG $\downarrow$ |
|-----------------|--------------------|----------------------|-----------------|--------------------|--------------------|------------------|
| Methods         | $N_{\text{outer}}$ | F4 $\rightarrow$ F22 |                 |                    |                    |                  |
| LensNeRF        | 1                  | 25.5282              | 0.8392          | 0.2844             | 0.1432             | 0.0822           |
| LensNeRF        | 2                  | <u>26.1382</u>       | 0.8392          | 0.2824             | 0.1415             | <u>0.0790</u>    |
| <b>LensNeRF</b> | 3                  | <b>26.1644</b>       | <b>0.8447</b>   | <b>0.2753</b>      | <b>0.1386</b>      | <b>0.0777</b>    |
| LensNeRF        | 4                  | 25.9976              | <u>0.8413</u>   | <u>0.2814</u>      | <u>0.1409</u>      | 0.0794           |

Table 7. Ablation study of increasing the number of outer loops.

three. We choose three as our final decision for  $N_{\text{outer}}$ .

**Qualitative results on F-number variation.** Our LensNeRF not only permits varying aperture sizes for the input images but also for the output images, as illustrated in Fig. 9. Inspect our results in a column-wise manner and note the extent to which our resulting images resemble the ground-truth images depicted in the bottom row. As evident from the results, regardless of the F-numbers of the input images, the proposed LensNeRF demonstrates a high degree of reproducibility of the target image.

**More qualitative results on deblur and defocus.** We present additional qualitative results on the deblur and defocus tasks, supplementing those shown in Fig. 3.

Additional qualitative results for defocus task are demonstrated in Fig. 10. As we can see, our LensNeRF model is capable of achieving a depth-aware defocus effect, where the background is blurred while the foreground details are rendered sharply, resulting in more realistic images.

**More qualitative results on classic task.** Here, we carry additional qualitative results on classic task in Fig. 12. These results show the case when the train images and the test images have identical F-number. Check how our LensNeRF can learn decent neural radiance fields from the train images with target F-number and reproduce novel view images using the learned model.

**Quantitative results for each scene.** In Sec. 5, quantitative Results are averaged to show the effectiveness of the proposed method in a compact manner. Here we show the non-abbreviated, full version of the quantitative results. Tab. 8 and Tab. 9 presents the quantitative results of the novel view synthesis for defocus task. Tab. 10 and Tab. 11 depicts the quantitative results of the novel view synthesis for deblur task. Tab. 12 and Tab. 13 illustrates the quantitative results of the novel view synthesis for classic task.

**Video material** Our LensNeRF can synthesize novel view images corresponding to the given focal lengths, F-numbers, and camera poses. To show the model capability, we attach a video file, ‘2024\_WACV\_LensNeRF.mp4’, that visualizes the three scenarios.

The first scenario concerns the defocus task. Using the networks trained on images with F-number 22 (F22), where F22 represents the camera with a narrow aperture, novel view images with varying aperture sizes are generated. Results of our LensNeRF are compared with those of NeRFocus [8] and DoF-NeRF [9]. The notable regions are highlighted with red and blue boxes in the video. The blue box highlights the region where the synthesized defocus blur of our LensNeRF successfully reflects the depth variation, showing the meaningful difference between the foreground and the background region, while the other methods cannot. The red box in the video emphasizes the region where baseline methods show the artifacts. DiskBlur+DVGO results are not included since this requires training multiple networks for every F-number that we want to synthesize and should run the corresponding model frame by frame, which is quite intractable.

The second scenario is for the deblur task. In this task, we use the networks trained on images with the F-number 4 (F4), where F4 represents the camera with a wide aperture. Using the trained networks, novel view images with varying camera poses are exhibited. Here, synthesized images are assumed to be captured from the F22 camera. The more crispy the results are, the better the model is. We compare our LensNeRF with KPAC+DVGO, DeblurNeRF [2], and DoF-NeRF [9] in the video.

The third scenario is a novel view synthesis of our LensNeRF with varying aperture sizes, focal lengths, and camera poses. For this third scenario LensNeRF is trained on the images with F-number 22.



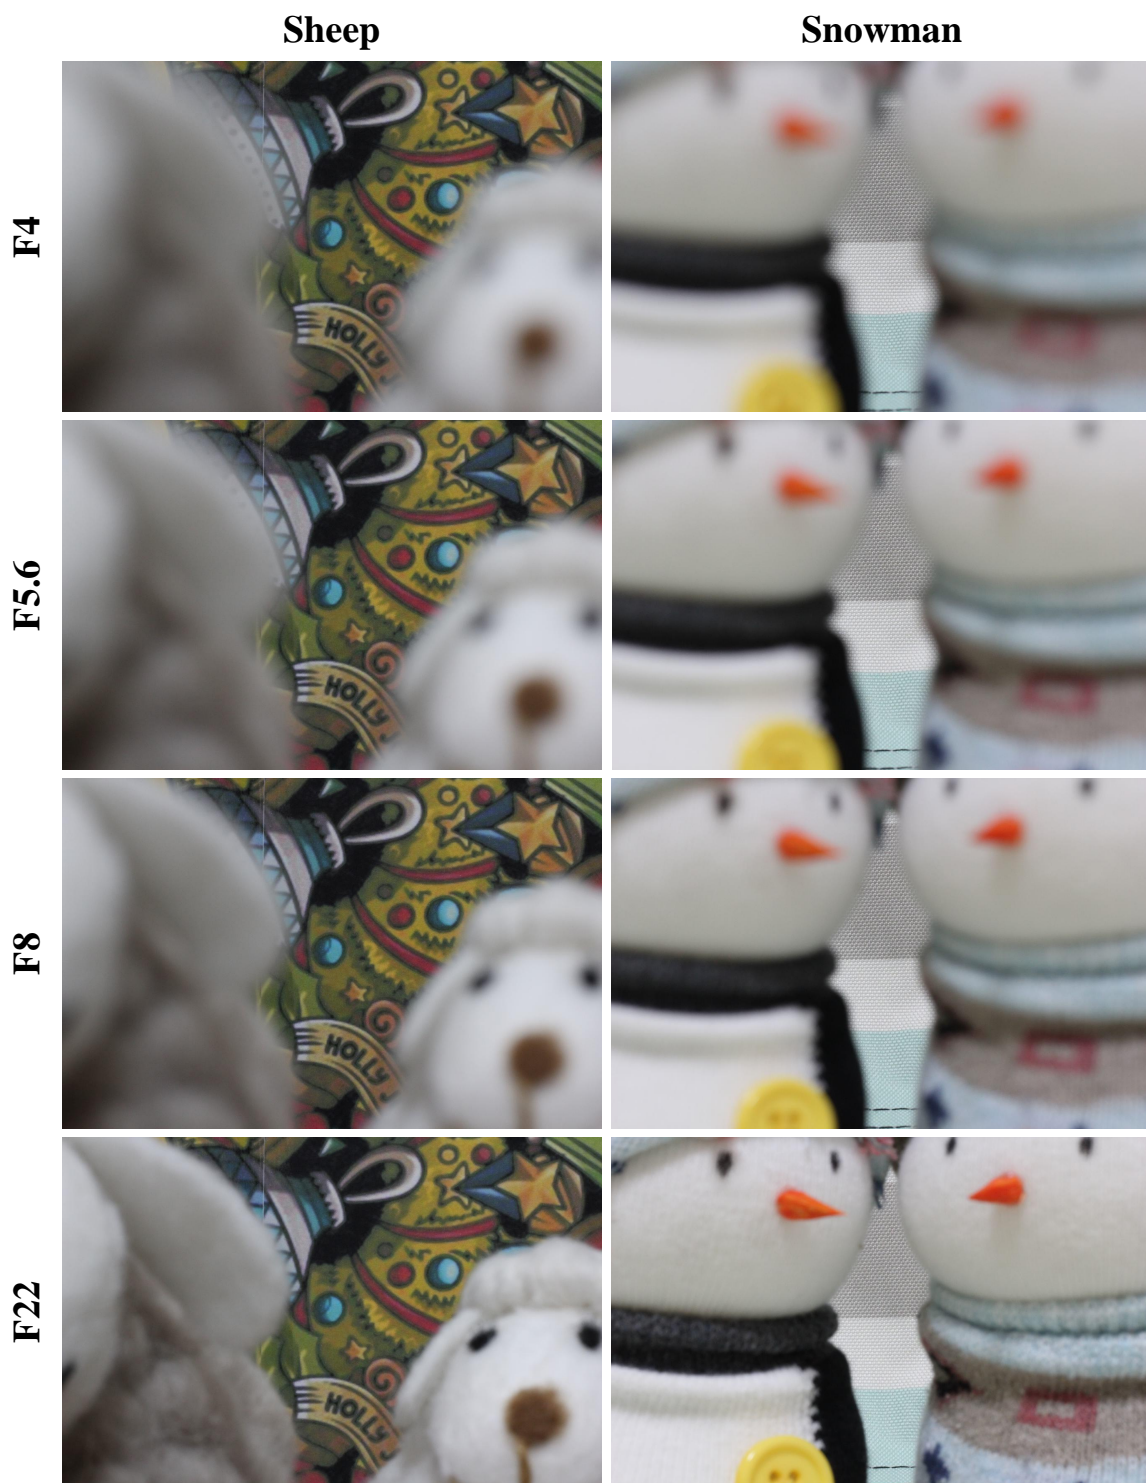

Figure 8. Sample images of our dataset. For each camera position, images with four different F-numbers are captured.

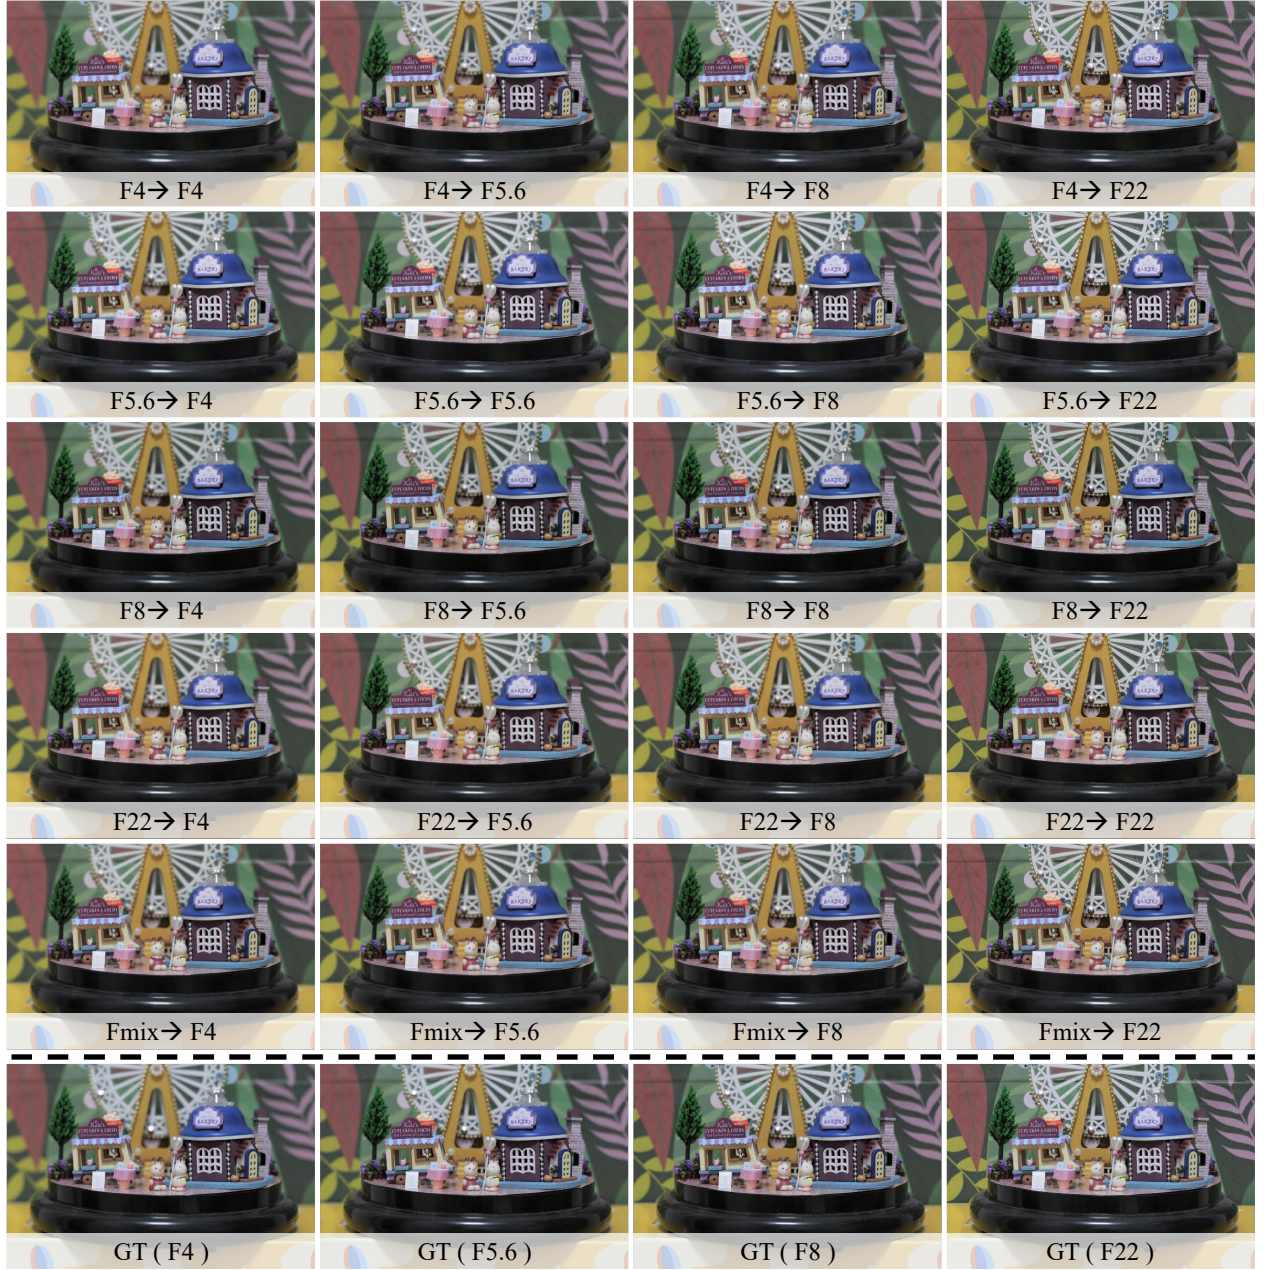

Figure 9. Additional qualitative results of our LensNeRF with a varying F-number. The F-number of the train images is denoted on the left side of the arrow, and the F-number of the target images is indicated on the right.



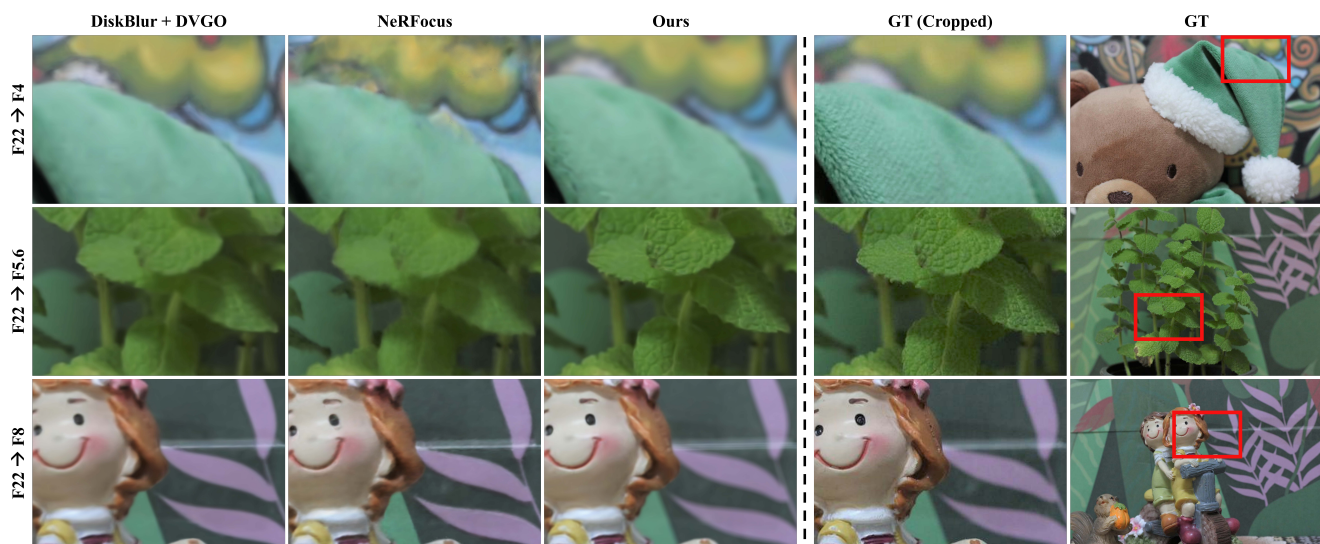

Figure 10. Additional qualitative results on novel view synthesis for the defocus task. The red box region on the ground-truth(GT) image is cropped and zoomed for ease of comparison.

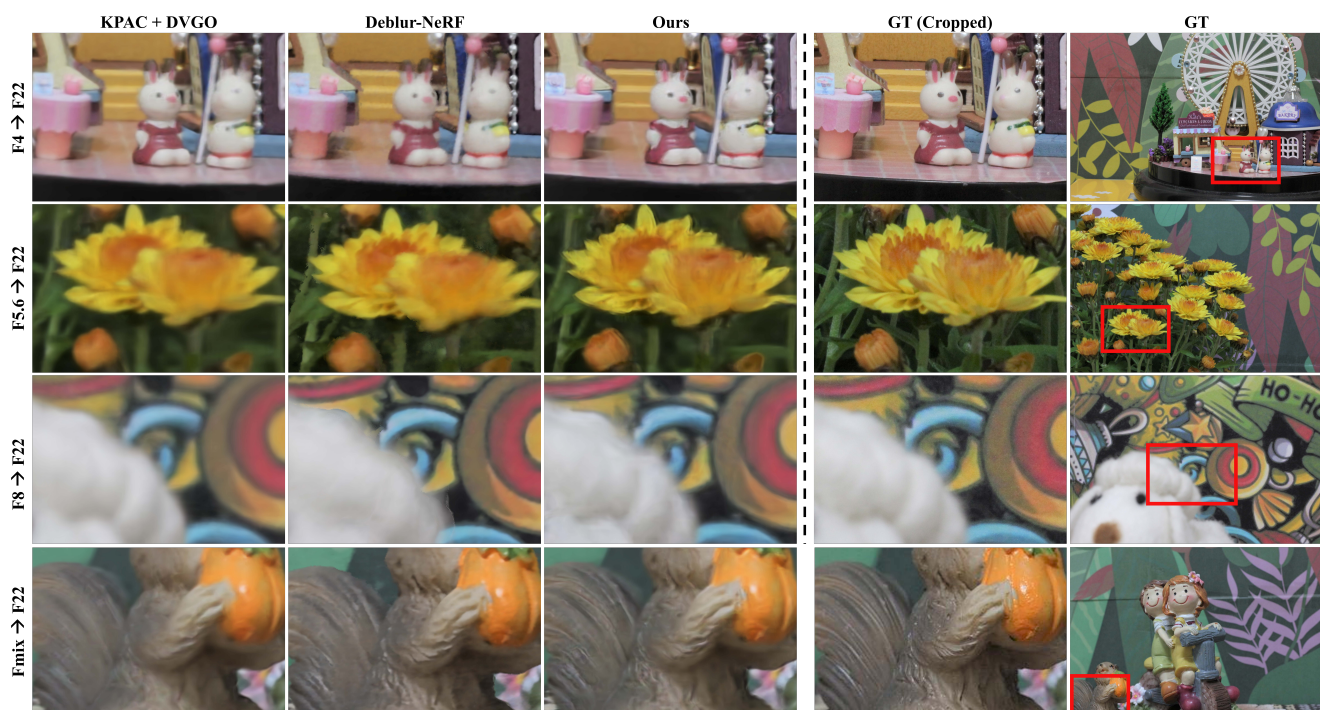

Figure 11. Additional qualitative results on novel view synthesis for the deblur task. The red box region on the ground-truth(GT) image is cropped and zoomed for ease of comparison.

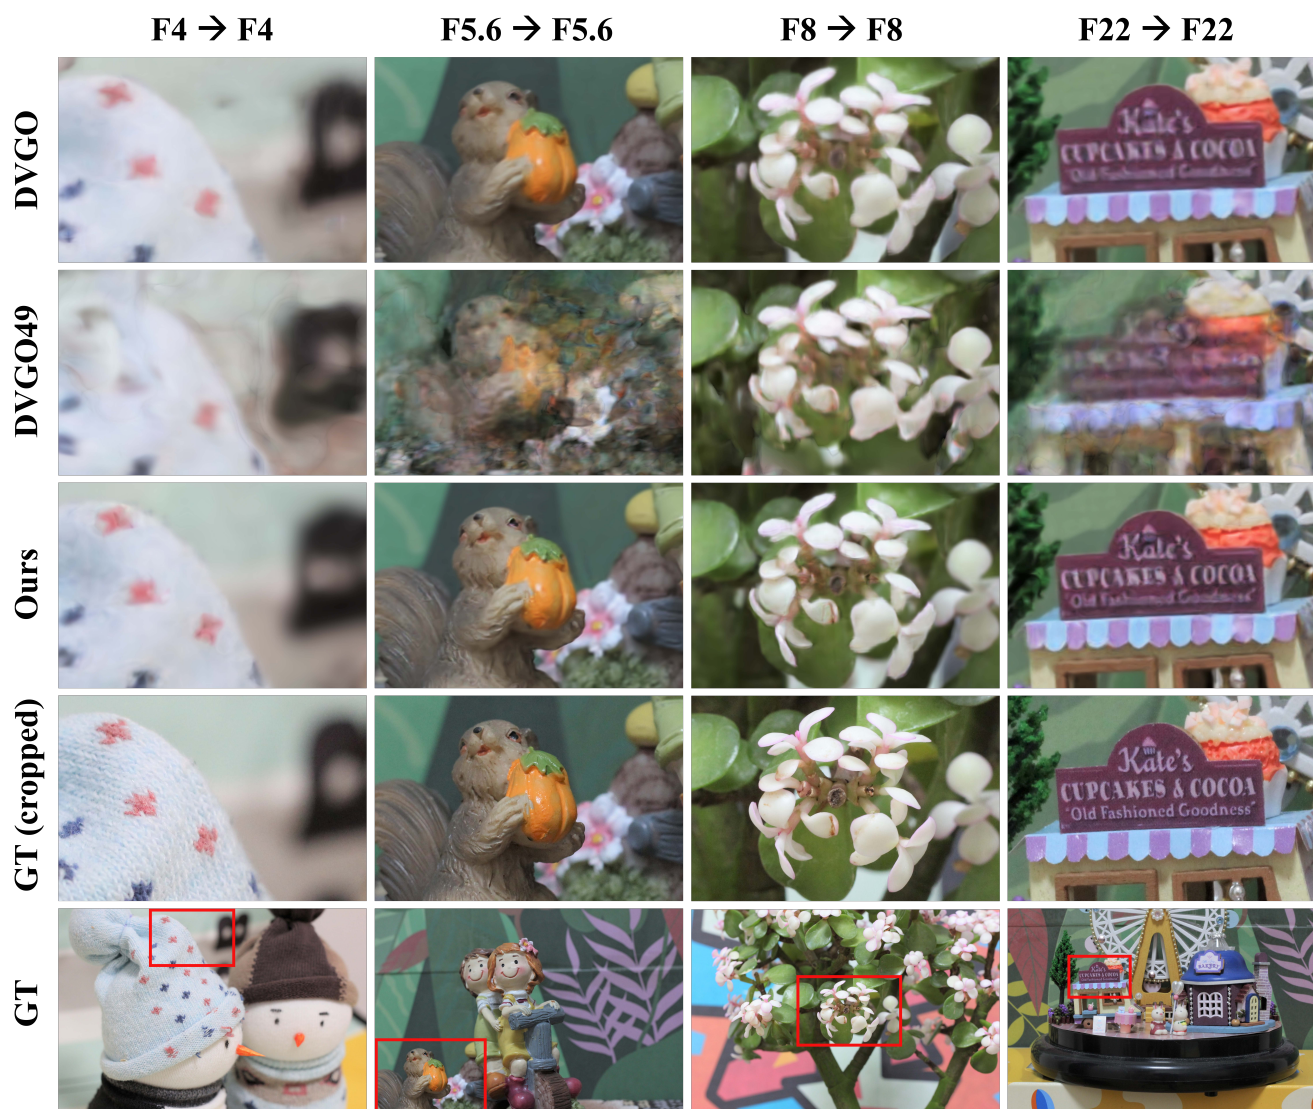

Figure 12. Additional qualitative results on novel view synthesis for the classic task. The red box region on the ground-truth(GT) image is cropped and zoomed for ease of comparison.



| Scene         | Method              | F22 → F4       |               |               | F22 → F5.6     |               |               |
|---------------|---------------------|----------------|---------------|---------------|----------------|---------------|---------------|
|               |                     | PSNR ↑         | SSIM ↑        | LPIPS ↓       | PSNR ↑         | SSIM ↑        | LPIPS ↓       |
| AmusementPark | DiskBlur + DVGO [7] | 27.6260        | 0.8884        | 0.2101        | 28.0447        | 0.8911        | 0.2000        |
|               | NeRFocus [8]        | 25.7578        | 0.7638        | 0.2444        | 26.3220        | 0.7837        | 0.2118        |
|               | LensNeRF-D (ours)   | <b>30.0711</b> | <b>0.9379</b> | <b>0.1363</b> | <b>30.4434</b> | <b>0.9361</b> | <b>0.1305</b> |
|               | LensNeRF-M (ours)   | <u>29.3756</u> | <u>0.9353</u> | <u>0.1413</u> | <u>29.6920</u> | <u>0.9331</u> | <u>0.1368</u> |
|               | LensNeRF-S (ours)   | 29.0534        | 0.9257        | 0.1628        | 29.2871        | 0.9270        | 0.1480        |
| AppleMint     | DiskBlur + DVGO [7] | 32.1852        | 0.9252        | 0.1938        | 33.1923        | 0.9185        | 0.1906        |
|               | NeRFocus [8]        | 29.2863        | 0.8281        | 0.2987        | 30.6599        | 0.8454        | 0.2361        |
|               | LensNeRF-D (ours)   | <u>32.7614</u> | <b>0.9453</b> | <b>0.1574</b> | <u>33.9252</u> | <b>0.9396</b> | <b>0.1511</b> |
|               | LensNeRF-M (ours)   | <b>33.2451</b> | <u>0.9442</u> | <u>0.1587</u> | <b>34.1561</b> | <u>0.9388</u> | <u>0.1525</u> |
|               | LensNeRF-S (ours)   | 32.1449        | 0.9371        | 0.1661        | 33.0752        | 0.9341        | 0.1531        |
| Bear          | DiskBlur + DVGO [7] | <u>29.8194</u> | 0.8576        | 0.3578        | <u>29.4636</u> | 0.8334        | 0.3809        |
|               | NeRFocus [8]        | 27.1469        | 0.7474        | 0.3940        | 27.3402        | 0.7369        | 0.4039        |
|               | LensNeRF-D (ours)   | <b>29.8708</b> | <b>0.8748</b> | <b>0.3163</b> | <b>30.0832</b> | <b>0.8538</b> | <b>0.3392</b> |
|               | LensNeRF-M (ours)   | 28.5379        | <u>0.8716</u> | <u>0.3209</u> | 28.5975        | <u>0.8500</u> | <u>0.3451</u> |
|               | LensNeRF-S (ours)   | 27.3534        | 0.8639        | 0.3245        | 27.5374        | 0.8435        | 0.3493        |
| BoyAndGirl    | DiskBlur + DVGO [7] | <b>31.0509</b> | 0.9264        | 0.1890        | <b>32.0322</b> | 0.9237        | 0.1763        |
|               | NeRFocus [8]        | 27.3666        | 0.7853        | 0.2398        | 27.9133        | 0.7986        | 0.2025        |
|               | LensNeRF-D (ours)   | 27.6177        | <u>0.9390</u> | <b>0.1641</b> | 28.7545        | <u>0.9404</u> | <b>0.1463</b> |
|               | LensNeRF-M (ours)   | <u>29.1614</u> | <b>0.9441</b> | <u>0.1649</u> | <u>30.5447</u> | <b>0.9456</b> | <u>0.1470</u> |
|               | LensNeRF-S (ours)   | 28.3230        | 0.9298        | 0.1837        | 29.4800        | 0.9360        | 0.1591        |
| Chrysanthemum | DiskBlur + DVGO [7] | 29.1768        | 0.8710        | 0.2408        | 29.3470        | 0.8597        | 0.2343        |
|               | NeRFocus [8]        | 27.5369        | 0.7920        | 0.2759        | 27.6831        | 0.7858        | 0.2677        |
|               | LensNeRF-D (ours)   | <b>30.5801</b> | <b>0.9083</b> | <b>0.1728</b> | <b>29.9209</b> | <b>0.8938</b> | <b>0.1751</b> |
|               | LensNeRF-M (ours)   | <u>30.5620</u> | <u>0.9077</u> | <u>0.1742</u> | <u>29.8963</u> | <u>0.8935</u> | <u>0.1783</u> |
|               | LensNeRF-S (ours)   | 29.5744        | 0.8969        | 0.1963        | 28.8580        | 0.8841        | 0.1906        |
| Gink          | DiskBlur + DVGO [7] | 26.1505        | 0.8874        | 0.2051        | 26.8244        | 0.8917        | 0.1853        |
|               | NeRFocus [8]        | 21.7560        | 0.6720        | 0.3159        | 21.7547        | 0.6785        | 0.3128        |
|               | LensNeRF-D (ours)   | <b>27.6488</b> | <b>0.9200</b> | <b>0.1480</b> | <b>28.1529</b> | <b>0.9185</b> | <b>0.1397</b> |
|               | LensNeRF-M (ours)   | <u>26.8747</u> | <u>0.9140</u> | <u>0.1520</u> | <u>27.1831</u> | <u>0.9126</u> | <u>0.1445</u> |
|               | LensNeRF-S (ours)   | 25.9160        | 0.9031        | 0.1695        | 26.0182        | 0.9024        | 0.1551        |
| Sheep         | DiskBlur + DVGO [7] | 27.1917        | 0.8655        | 0.4081        | 28.0124        | 0.8621        | 0.3989        |
|               | NeRFocus [8]        | 23.4382        | 0.6587        | 0.4295        | 24.2760        | 0.6718        | 0.4134        |
|               | LensNeRF-D (ours)   | <b>28.9670</b> | <b>0.9027</b> | <b>0.3211</b> | <b>28.5760</b> | <b>0.8932</b> | <b>0.3252</b> |
|               | LensNeRF-M (ours)   | 28.0896        | <u>0.8999</u> | <u>0.3222</u> | 27.8388        | <u>0.8906</u> | <u>0.3284</u> |
|               | LensNeRF-S (ours)   | <u>28.7499</u> | 0.8922        | 0.3483        | <u>28.5063</u> | 0.8867        | 0.3436        |
| Snowman       | DiskBlur + DVGO [7] | 22.0553        | 0.7512        | 0.4681        | 22.6376        | 0.7320        | 0.4776        |
|               | NeRFocus [8]        | 21.0261        | 0.6123        | 0.4364        | 20.9126        | 0.5968        | 0.4554        |
|               | LensNeRF-D (ours)   | <b>24.1898</b> | <b>0.7896</b> | <b>0.3903</b> | <b>23.9147</b> | <u>0.7660</u> | <b>0.4114</b> |
|               | LensNeRF-M (ours)   | <u>23.9007</u> | <u>0.7850</u> | <u>0.3978</u> | 23.6968        | <b>0.7614</b> | <u>0.4181</u> |
|               | LensNeRF-S (ours)   | 23.8299        | 0.7765        | 0.4127        | <u>23.7048</u> | 0.7547        | 0.4249        |
| Xmas          | DiskBlur + DVGO [7] | 24.1016        | 0.7919        | 0.3782        | 23.6838        | 0.7713        | 0.3693        |
|               | NeRFocus [8]        | 20.7413        | 0.5504        | 0.4794        | 20.5110        | 0.5431        | 0.4583        |
|               | LensNeRF-D (ours)   | <u>25.1060</u> | <u>0.8415</u> | <u>0.3036</u> | <u>24.5831</u> | <u>0.8223</u> | <u>0.3008</u> |
|               | LensNeRF-M (ours)   | <b>25.3713</b> | <b>0.8446</b> | <b>0.2993</b> | <b>24.7528</b> | <b>0.8261</b> | <b>0.2980</b> |
|               | LensNeRF-S (ours)   | 25.0375        | 0.8288        | 0.3412        | 24.4739        | 0.8150        | 0.3148        |

Table 8. Quantitative result for each scene on defocus task. The F-number of the train images is denoted on the left side of the arrow, and the F-number of the target images is indicated on the right. The **best** results are in boldface, and the second-best results are underlined.



| Scene         | Method              | F22 → F8       |               |               | Fmix → F4      |               |               |
|---------------|---------------------|----------------|---------------|---------------|----------------|---------------|---------------|
|               |                     | PSNR ↑         | SSIM ↑        | LPIPS ↓       | PSNR ↑         | SSIM ↑        | LPIPS ↓       |
| AmusementPark | DiskBlur + DVGO [7] | 28.3758        | 0.8919        | 0.1986        | N/A            | N/A           | N/A           |
|               | NeRFocus [8]        | 26.5634        | 0.7917        | 0.1976        | N/A            | N/A           | N/A           |
|               | LensNeRF-D (ours)   | <b>30.5259</b> | <b>0.9309</b> | <b>0.1359</b> | <b>30.5696</b> | <b>0.9360</b> | <b>0.1394</b> |
|               | LensNeRF-M (ours)   | <u>29.7644</u> | <u>0.9274</u> | <u>0.1408</u> | <u>30.2374</u> | <u>0.9328</u> | <u>0.1505</u> |
|               | LensNeRF-S (ours)   | 29.3875        | 0.9230        | 0.1490        | 29.0247        | 0.9276        | 0.1582        |
| AppleMint     | DiskBlur + DVGO [7] | 33.7195        | 0.9108        | 0.1950        | N/A            | N/A           | N/A           |
|               | NeRFocus [8]        | 31.7548        | 0.8590        | 0.2073        | N/A            | N/A           | N/A           |
|               | LensNeRF-D (ours)   | <b>34.3519</b> | <b>0.9324</b> | <b>0.1545</b> | <b>34.4145</b> | <b>0.9435</b> | <u>0.1682</u> |
|               | LensNeRF-M (ours)   | <u>34.2048</u> | <u>0.9312</u> | <u>0.1549</u> | <u>33.5465</u> | <u>0.9421</u> | <u>0.1702</u> |
|               | LensNeRF-S (ours)   | 33.3927        | 0.9277        | 0.1573        | 33.3383        | 0.9382        | <b>0.1675</b> |
| Bear          | DiskBlur + DVGO [7] | <u>29.5772</u> | 0.8162        | 0.4027        | N/A            | N/A           | N/A           |
|               | NeRFocus [8]        | 27.4255        | 0.7243        | 0.4207        | N/A            | N/A           | N/A           |
|               | LensNeRF-D (ours)   | <b>30.0923</b> | <b>0.8359</b> | <b>0.3613</b> | <b>30.3099</b> | <b>0.8739</b> | 0.3211        |
|               | LensNeRF-M (ours)   | 28.5800        | <u>0.8319</u> | <u>0.3677</u> | <u>29.2640</u> | <u>0.8731</u> | <b>0.3192</b> |
|               | LensNeRF-S (ours)   | 27.5922        | 0.8260        | 0.3740        | 28.2299        | 0.8674        | <u>0.3200</u> |
| BoyAndGirl    | DiskBlur + DVGO [7] | <b>31.9002</b> | 0.9195        | 0.1763        | N/A            | N/A           | N/A           |
|               | NeRFocus [8]        | 28.1056        | 0.8028        | 0.1842        | N/A            | N/A           | N/A           |
|               | LensNeRF-D (ours)   | 28.6092        | <u>0.9362</u> | <u>0.1437</u> | <b>31.7020</b> | <b>0.9486</b> | <b>0.1494</b> |
|               | LensNeRF-M (ours)   | <u>30.3865</u> | <b>0.9414</b> | <b>0.1421</b> | <u>31.0127</u> | <u>0.9482</u> | <u>0.1513</u> |
|               | LensNeRF-S (ours)   | 29.3030        | 0.9344        | 0.1550        | 28.5908        | 0.9408        | 0.1541        |
| Chrysanthemum | DiskBlur + DVGO [7] | 28.8865        | 0.8461        | 0.2357        | N/A            | N/A           | N/A           |
|               | NeRFocus [8]        | 27.2675        | 0.7715        | 0.2680        | N/A            | N/A           | N/A           |
|               | LensNeRF-D (ours)   | <b>30.0562</b> | <b>0.8801</b> | <b>0.1807</b> | <b>31.0876</b> | <b>0.9058</b> | <b>0.1762</b> |
|               | LensNeRF-M (ours)   | <u>29.9087</u> | <u>0.8791</u> | <u>0.1851</u> | 30.9844        | <u>0.9046</u> | <u>0.1765</u> |
|               | LensNeRF-S (ours)   | 29.0372        | 0.8708        | 0.1940        | <u>31.0812</u> | 0.8982        | 0.1915        |
| Gink          | DiskBlur + DVGO [7] | 27.1617        | 0.8880        | 0.1809        | N/A            | N/A           | N/A           |
|               | NeRFocus [8]        | 21.6741        | 0.6826        | 0.3193        | N/A            | N/A           | N/A           |
|               | LensNeRF-D (ours)   | <b>28.3778</b> | <b>0.9121</b> | <b>0.1430</b> | <b>28.0766</b> | <b>0.9264</b> | <b>0.1403</b> |
|               | LensNeRF-M (ours)   | <u>27.3231</u> | <u>0.9050</u> | <u>0.1487</u> | <u>27.3630</u> | <u>0.9225</u> | <u>0.1419</u> |
|               | LensNeRF-S (ours)   | 26.1150        | 0.8952        | 0.1582        | 27.2124        | 0.9134        | 0.1526        |
| Sheep         | DiskBlur + DVGO [7] | <b>28.3121</b> | 0.8598        | 0.3905        | N/A            | N/A           | N/A           |
|               | NeRFocus [8]        | 24.7532        | 0.6796        | 0.4012        | N/A            | N/A           | N/A           |
|               | LensNeRF-D (ours)   | <u>28.3012</u> | <b>0.8821</b> | <b>0.3313</b> | <b>29.2493</b> | <b>0.9009</b> | <b>0.3278</b> |
|               | LensNeRF-M (ours)   | 27.5591        | <u>0.8800</u> | <u>0.3376</u> | 28.6573        | <u>0.9005</u> | <u>0.3283</u> |
|               | LensNeRF-S (ours)   | 28.2099        | 0.8780        | 0.3504        | <u>29.0857</u> | 0.8947        | 0.3375        |
| Snowman       | DiskBlur + DVGO [7] | 23.1258        | 0.7155        | 0.4869        | N/A            | N/A           | N/A           |
|               | NeRFocus [8]        | 20.7424        | 0.5766        | 0.4746        | N/A            | N/A           | N/A           |
|               | LensNeRF-D (ours)   | <b>23.8557</b> | <b>0.7445</b> | <b>0.4305</b> | <b>24.5845</b> | <b>0.7937</b> | <b>0.3708</b> |
|               | LensNeRF-M (ours)   | 23.6008        | <u>0.7390</u> | <u>0.4385</u> | 24.1103        | 0.7899        | <u>0.3800</u> |
|               | LensNeRF-S (ours)   | <u>23.6206</u> | 0.7343        | 0.4387        | <u>24.1708</u> | 0.7855        | 0.3907        |
| Xmas          | DiskBlur + DVGO [7] | 23.2305        | 0.7460        | 0.3722        | N/A            | N/A           | N/A           |
|               | NeRFocus [8]        | 20.2799        | 0.5312        | 0.4479        | N/A            | N/A           | N/A           |
|               | LensNeRF-D (ours)   | 24.0493        | 0.7985        | <b>0.3084</b> | 25.4464        | <b>0.8476</b> | <b>0.2954</b> |
|               | LensNeRF-M (ours)   | <b>24.1652</b> | <b>0.8003</b> | <u>0.3109</u> | <u>25.5025</u> | 0.8458        | <u>0.2957</u> |
|               | LensNeRF-S (ours)   | 23.8400        | 0.7898        | 0.3198        | <b>25.5650</b> | 0.8395        | 0.3154        |

Table 9. Quantitative result for each scene on defocus task. The F-number of the train images is denoted on the left side of the arrow, and the F-number of the target images is indicated on the right. The **best** results are in boldface, and the second-best results are underlined.

| Scene         | Method              | F4 → F22       |               |               |               | F5.6 → F22     |               |               |               |
|---------------|---------------------|----------------|---------------|---------------|---------------|----------------|---------------|---------------|---------------|
|               |                     | PSNR ↑         | SSIM ↑        | LPIPS ↓       | DISTS ↓       | PSNR ↑         | SSIM ↑        | LPIPS ↓       | DISTS ↓       |
| AmusementPark | KPAC [5] + DVGO [7] | <b>28.3739</b> | 0.8679        | 0.2421        | 0.1201        | <u>29.2216</u> | 0.8834        | 0.2123        | 0.1047        |
|               | Deblur-NeRF [2]     | 24.0320        | 0.7196        | 0.2086        | 0.1100        | 23.8261        | 0.7236        | 0.1862        | 0.0944        |
|               | LensNeRF-D (ours)   | <u>28.3535</u> | <b>0.8841</b> | <b>0.1866</b> | <b>0.0897</b> | 29.0369        | <b>0.8952</b> | <b>0.1724</b> | <u>0.0845</u> |
|               | LensNeRF-M (ours)   | 27.6138        | 0.8772        | <u>0.1916</u> | <u>0.0929</u> | <b>29.2290</b> | 0.8926        | <u>0.1767</u> | <b>0.0837</b> |
|               | LensNeRF-S (ours)   | 28.2380        | <u>0.8784</u> | 0.2045        | 0.0977        | 28.9028        | 0.8906        | 0.1848        | 0.0873        |
| AppleMint     | KPAC [5] + DVGO [7] | <b>32.3640</b> | <b>0.8824</b> | 0.2687        | 0.1581        | <b>32.8811</b> | <b>0.8946</b> | 0.2334        | 0.1364        |
|               | Deblur-NeRF [2]     | 26.4975        | 0.7252        | 0.2567        | <b>0.1384</b> | 26.7817        | 0.7277        | 0.2174        | <b>0.1200</b> |
|               | LensNeRF-D (ours)   | <u>29.0286</u> | <u>0.8785</u> | <b>0.2277</b> | <u>0.1450</u> | <u>30.2464</u> | <u>0.8922</u> | <b>0.2093</b> | 0.1333        |
|               | LensNeRF-M (ours)   | 28.0724        | 0.8738        | <u>0.2361</u> | 0.1481        | 30.0794        | 0.8916        | <u>0.2108</u> | 0.1328        |
|               | LensNeRF-S (ours)   | 27.5809        | 0.8648        | 0.2484        | 0.1512        | 29.6704        | 0.8844        | 0.2168        | 0.1348        |
| Bear          | KPAC [5] + DVGO [7] | 28.7261        | 0.7888        | 0.4395        | 0.2015        | 28.8906        | 0.7945        | 0.4292        | 0.1898        |
|               | Deblur-NeRF [2]     | 26.0364        | 0.6631        | 0.4286        | 0.1904        | 26.3210        | 0.6716        | 0.4089        | <b>0.1696</b> |
|               | LensNeRF-D (ours)   | <b>29.4325</b> | <u>0.8017</u> | <b>0.4129</b> | <u>0.1845</u> | <b>29.4990</b> | <b>0.8078</b> | <b>0.3965</b> | <u>0.1737</u> |
|               | LensNeRF-M (ours)   | <u>29.3252</u> | <b>0.8021</b> | <u>0.4140</u> | <b>0.1841</b> | <u>29.4810</u> | <u>0.8077</u> | <u>0.4031</u> | 0.1770        |
|               | LensNeRF-S (ours)   | 28.9853        | 0.7970        | 0.4198        | 0.1851        | 29.0484        | 0.8025        | 0.4072        | 0.1798        |
| BoyAndGirl    | KPAC [5] + DVGO [7] | <u>30.2865</u> | 0.8592        | 0.2784        | 0.1162        | 30.6799        | 0.8716        | 0.2539        | 0.1027        |
|               | Deblur-NeRF [2]     | 26.2927        | 0.7360        | 0.2537        | 0.0968        | 27.8590        | 0.7797        | 0.2131        | 0.0820        |
|               | LensNeRF-D (ours)   | <b>30.3920</b> | <b>0.8775</b> | <b>0.2252</b> | <b>0.0859</b> | <b>31.5603</b> | <u>0.8885</u> | <b>0.2102</b> | <u>0.0813</u> |
|               | LensNeRF-M (ours)   | 29.7411        | <u>0.8757</u> | <b>0.2252</b> | <u>0.0884</u> | <u>31.3324</u> | <b>0.8889</b> | <u>0.2117</u> | <b>0.0810</b> |
|               | LensNeRF-S (ours)   | 29.7547        | 0.8704        | <u>0.2387</u> | 0.0915        | 30.6683        | 0.8835        | 0.2203        | 0.0843        |
| Chrysanthemum | KPAC [5] + DVGO [7] | <b>26.8967</b> | 0.7818        | 0.3391        | 0.2079        | <b>27.9647</b> | 0.8020        | 0.2910        | 0.1746        |
|               | Deblur-NeRF [2]     | 23.6715        | 0.6611        | 0.3108        | 0.1927        | 19.6084        | 0.5441        | 0.3438        | 0.1754        |
|               | LensNeRF-D (ours)   | <u>26.8733</u> | <b>0.7932</b> | <b>0.2756</b> | <b>0.1696</b> | 27.2173        | <b>0.8075</b> | <b>0.2469</b> | <b>0.1483</b> |
|               | LensNeRF-M (ours)   | 25.2780        | <u>0.7853</u> | <u>0.2823</u> | <u>0.1772</u> | <u>27.5385</u> | <u>0.8074</u> | <u>0.2496</u> | <u>0.1539</u> |
|               | LensNeRF-S (ours)   | 26.8668        | 0.7820        | 0.3011        | 0.1865        | 27.1294        | 0.7969        | 0.2696        | 0.1660        |
| Gink          | KPAC [5] + DVGO [7] | <b>24.8969</b> | <b>0.8289</b> | 0.2849        | 0.1712        | <b>25.9055</b> | <b>0.8471</b> | 0.2400        | 0.1512        |
|               | Deblur-NeRF [2]     | 21.1777        | 0.6350        | 0.2875        | 0.1621        | 21.6752        | 0.6583        | 0.2510        | 0.1487        |
|               | LensNeRF-D (ours)   | <u>24.4122</u> | <u>0.8225</u> | <b>0.2616</b> | <b>0.1528</b> | 25.4159        | <u>0.8410</u> | <b>0.2251</b> | <b>0.1375</b> |
|               | LensNeRF-M (ours)   | 24.0657        | 0.8153        | <u>0.2660</u> | <u>0.1588</u> | <u>25.6115</u> | 0.8407        | <u>0.2260</u> | <u>0.1377</u> |
|               | LensNeRF-S (ours)   | 23.7185        | 0.8060        | 0.2858        | 0.1639        | 25.0557        | 0.8288        | 0.2415        | 0.1470        |
| Sheep         | KPAC [5] + DVGO [7] | <b>25.9083</b> | 0.8122        | 0.4259        | 0.2273        | <u>27.2270</u> | 0.8288        | 0.3945        | 0.1989        |
|               | Deblur-NeRF [2]     | 21.9172        | 0.5843        | 0.4206        | 0.1930        | 21.8571        | 0.5855        | 0.4026        | 0.1780        |
|               | LensNeRF-D (ours)   | <u>25.7275</u> | <b>0.8276</b> | <b>0.3778</b> | <b>0.1734</b> | 26.5171        | <b>0.8352</b> | <b>0.3595</b> | <b>0.1647</b> |
|               | LensNeRF-M (ours)   | 25.6815        | <u>0.8251</u> | <u>0.3840</u> | <u>0.1751</u> | 26.7543        | <u>0.8346</u> | <u>0.3638</u> | <u>0.1653</u> |
|               | LensNeRF-S (ours)   | 25.3943        | 0.8204        | 0.3904        | 0.1841        | <b>27.2621</b> | 0.8302        | 0.3714        | 0.1724        |
| Snowman       | KPAC [5] + DVGO [7] | <b>23.1944</b> | 0.6828        | 0.5094        | 0.2477        | <b>23.4589</b> | 0.6878        | 0.5015        | 0.2445        |
|               | Deblur-NeRF [2]     | 22.1364        | 0.5918        | <b>0.3631</b> | <b>0.1495</b> | 21.0770        | 0.5548        | <b>0.3589</b> | <b>0.1469</b> |
|               | LensNeRF-D (ours)   | <u>22.6324</u> | <b>0.6933</b> | 0.4744        | <u>0.2262</u> | <u>22.8607</u> | <b>0.6984</b> | <u>0.4638</u> | 0.2243        |
|               | LensNeRF-M (ours)   | 22.5241        | <u>0.6917</u> | <u>0.4731</u> | 0.2292        | 22.2594        | <u>0.6927</u> | 0.4649        | <u>0.2241</u> |
|               | LensNeRF-S (ours)   | 22.2195        | 0.6858        | 0.4800        | 0.2335        | 21.9793        | 0.6873        | 0.4717        | 0.2309        |
| Xmas          | KPAC [5] + DVGO [7] | <b>21.3470</b> | <b>0.6245</b> | 0.4978        | 0.2520        | 21.7410        | 0.6514        | 0.4419        | 0.2114        |
|               | Deblur-NeRF [2]     | 19.2838        | 0.4105        | 0.5063        | 0.3356        | 19.4209        | 0.4325        | 0.4602        | 0.3039        |
|               | LensNeRF-D (ours)   | <u>21.3229</u> | <u>0.6228</u> | <b>0.4735</b> | <b>0.2343</b> | <u>21.9174</u> | <b>0.6612</b> | <b>0.4072</b> | <b>0.1944</b> |
|               | LensNeRF-M (ours)   | 21.2269        | 0.6214        | <u>0.4810</u> | <u>0.2392</u> | <b>21.9612</b> | <u>0.6570</u> | <u>0.4153</u> | <u>0.1975</u> |
|               | LensNeRF-S (ours)   | 21.1753        | 0.6183        | 0.4892        | 0.2490        | 21.8146        | 0.6487        | 0.4280        | 0.2021        |

Table 10. Quantitative result for each scene on deblur task. The F-number of the train images is denoted on the left side of the arrow, and the F-number of the target images is indicated on the right. The **best** results are in boldface, and the second-best results are underlined.

| Scene         | Method              | F8 → F22       |               |               |               | Fmix → F22     |               |               |               |
|---------------|---------------------|----------------|---------------|---------------|---------------|----------------|---------------|---------------|---------------|
|               |                     | PSNR ↑         | SSIM ↑        | LPIPS ↓       | DISTS ↓       | PSNR ↑         | SSIM ↑        | LPIPS ↓       | DISTS ↓       |
| AmusementPark | KPAC [5] + DVGO [7] | <b>29.5907</b> | 0.8916        | 0.1920        | 0.0953        | <u>29.6560</u> | 0.8899        | 0.1984        | 0.0982        |
|               | Deblur-NeRF [2]     | 23.4794        | 0.7105        | <u>0.1651</u> | 0.0857        | 23.1667        | 0.7084        | <u>0.1651</u> | 0.0884        |
|               | LensNeRF-D (ours)   | 27.8131        | <b>0.8962</b> | <b>0.1619</b> | <b>0.0804</b> | <b>29.6984</b> | <b>0.9032</b> | <b>0.1632</b> | <b>0.0812</b> |
|               | LensNeRF-M (ours)   | 26.3508        | 0.8843        | 0.1710        | 0.0826        | 28.5575        | 0.8974        | 0.1804        | 0.0862        |
|               | LensNeRF-S (ours)   | <u>28.5217</u> | <u>0.8935</u> | 0.1728        | <u>0.0812</u> | 29.3999        | <u>0.8980</u> | 0.1728        | <u>0.0855</u> |
| AppleMint     | KPAC [5] + DVGO [7] | <b>33.0230</b> | <u>0.9006</u> | 0.2136        | 0.1281        | <b>33.6286</b> | 0.8991        | 0.2191        | 0.1324        |
|               | Deblur-NeRF [2]     | 27.8957        | 0.7541        | <b>0.1864</b> | <b>0.1088</b> | 30.0880        | 0.8099        | <b>0.1717</b> | <b>0.1064</b> |
|               | LensNeRF-D (ours)   | 30.3849        | 0.8997        | 0.1961        | <u>0.1210</u> | 30.8337        | <u>0.9019</u> | <u>0.1958</u> | 0.1226        |
|               | LensNeRF-M (ours)   | <u>31.2816</u> | <b>0.9029</b> | <u>0.1941</u> | 0.1217        | <u>31.6540</u> | <b>0.9028</b> | 0.1971        | <u>0.1222</u> |
|               | LensNeRF-S (ours)   | 29.4309        | 0.8942        | 0.2015        | 0.1252        | 30.1835        | 0.8966        | 0.2021        | 0.1236        |
| Bear          | KPAC [5] + DVGO [7] | 28.7286        | 0.7960        | 0.4212        | 0.1845        | 28.9707        | 0.7954        | 0.4245        | 0.1873        |
|               | Deblur-NeRF [2]     | 25.2712        | 0.6536        | 0.4143        | <b>0.1647</b> | 25.6789        | 0.6559        | 0.4155        | <b>0.1673</b> |
|               | LensNeRF-D (ours)   | <b>30.4717</b> | <b>0.8119</b> | <b>0.3914</b> | <u>0.1684</u> | <b>30.7691</b> | <b>0.8104</b> | <b>0.3983</b> | <u>0.1709</u> |
|               | LensNeRF-M (ours)   | <u>30.2048</u> | <u>0.8104</u> | <u>0.3946</u> | 0.1692        | <u>29.5646</u> | <u>0.8080</u> | <u>0.4002</u> | 0.1731        |
|               | LensNeRF-S (ours)   | 29.2393        | 0.8051        | 0.4020        | 0.1749        | 29.0679        | 0.8035        | 0.4050        | 0.1758        |
| BoyAndGirl    | KPAC [5] + DVGO [7] | 30.9342        | 0.8801        | 0.2328        | 0.0921        | 31.1469        | 0.8787        | 0.2373        | 0.0965        |
|               | Deblur-NeRF [2]     | 24.4676        | 0.6797        | 0.2090        | 0.0787        | 23.4344        | 0.6377        | 0.2139        | 0.0832        |
|               | LensNeRF-D (ours)   | <b>31.4174</b> | <b>0.8963</b> | <b>0.1956</b> | 0.0770        | <b>31.8167</b> | <b>0.8982</b> | <b>0.1938</b> | <b>0.0768</b> |
|               | LensNeRF-M (ours)   | 30.8653        | <u>0.8955</u> | <u>0.1977</u> | <u>0.0760</u> | <u>31.7581</u> | <u>0.8969</u> | <u>0.2010</u> | <u>0.0780</u> |
|               | LensNeRF-S (ours)   | <u>31.0685</u> | 0.8920        | 0.1994        | <b>0.0756</b> | 30.4726        | 0.8914        | 0.2037        | 0.0803        |
| Chrysanthemum | KPAC [5] + DVGO [7] | <b>28.2782</b> | 0.8136        | 0.2559        | 0.1532        | <b>28.5539</b> | 0.8117        | 0.2656        | 0.1620        |
|               | Deblur-NeRF [2]     | 23.4855        | 0.6463        | 0.2458        | 0.1550        | 24.6327        | 0.6855        | <b>0.2195</b> | 0.1480        |
|               | LensNeRF-D (ours)   | 27.7245        | <u>0.8186</u> | <b>0.2276</b> | <u>0.1378</u> | 28.1865        | <b>0.8191</b> | <u>0.2276</u> | <b>0.1379</b> |
|               | LensNeRF-M (ours)   | <u>28.1649</u> | <b>0.8195</b> | <u>0.2294</u> | <b>0.1376</b> | 27.9069        | <u>0.8170</u> | 0.2302        | <u>0.1400</u> |
|               | LensNeRF-S (ours)   | 27.5404        | 0.8096        | 0.2435        | 0.1509        | <u>28.1871</u> | 0.8125        | 0.2371        | 0.1464        |
| Gink          | KPAC [5] + DVGO [7] | <b>26.6345</b> | <b>0.8579</b> | 0.2126        | 0.1362        | <b>26.6667</b> | 0.8579        | 0.2199        | 0.1428        |
|               | Deblur-NeRF [2]     | 21.6700        | 0.6716        | 0.2185        | 0.1355        | 21.8077        | 0.6757        | 0.2021        | 0.1378        |
|               | LensNeRF-D (ours)   | <u>25.9566</u> | <u>0.8548</u> | <u>0.1999</u> | <u>0.1260</u> | <u>27.0457</u> | <b>0.8642</b> | <b>0.1939</b> | <b>0.1266</b> |
|               | LensNeRF-M (ours)   | 25.9322        | 0.8544        | <b>0.1988</b> | <b>0.1237</b> | 26.5467        | <u>0.8595</u> | <u>0.1967</u> | <u>0.1292</u> |
|               | LensNeRF-S (ours)   | 25.7988        | 0.8430        | 0.2127        | 0.1326        | 25.9147        | 0.8471        | 0.2044        | 0.1310        |
| Sheep         | KPAC [5] + DVGO [7] | <b>27.8938</b> | 0.8386        | 0.3738        | 0.1774        | <b>27.7670</b> | 0.8387        | 0.3765        | 0.1799        |
|               | Deblur-NeRF [2]     | 21.6657        | 0.5796        | 0.3878        | <u>0.1554</u> | 21.2183        | 0.5726        | 0.3931        | <b>0.1467</b> |
|               | LensNeRF-D (ours)   | 27.5818        | <b>0.8428</b> | <b>0.3444</b> | <b>0.1530</b> | <u>27.2895</u> | <b>0.8466</b> | <b>0.3450</b> | <u>0.1486</u> |
|               | LensNeRF-M (ours)   | <u>27.7009</u> | <u>0.8420</u> | <u>0.3504</u> | 0.1564        | 26.2731        | <u>0.8438</u> | <u>0.3520</u> | 0.1534        |
|               | LensNeRF-S (ours)   | 27.6946        | 0.8384        | 0.3561        | 0.1610        | 26.4936        | 0.8400        | 0.3539        | 0.1573        |
| Snowman       | KPAC [5] + DVGO [7] | <b>23.3518</b> | 0.6905        | 0.4958        | 0.2409        | <b>23.3714</b> | 0.6898        | 0.4966        | 0.2379        |
|               | Deblur-NeRF [2]     | 22.5869        | 0.6127        | <b>0.3406</b> | <b>0.1390</b> | 19.0811        | 0.4731        | <b>0.3948</b> | <b>0.1520</b> |
|               | LensNeRF-D (ours)   | <u>23.0384</u> | <b>0.6998</b> | <u>0.4591</u> | <u>0.2230</u> | <u>22.6467</u> | <b>0.6999</b> | <u>0.4572</u> | <u>0.2210</u> |
|               | LensNeRF-M (ours)   | 22.4972        | <u>0.6956</u> | 0.4682        | 0.2255        | 22.3046        | <u>0.6958</u> | 0.4647        | 0.2216        |
|               | LensNeRF-S (ours)   | 22.4932        | 0.6922        | 0.4681        | 0.2290        | 22.3106        | 0.6942        | 0.4641        | 0.2252        |
| Xmas          | KPAC [5] + DVGO [7] | 22.0415        | 0.6715        | 0.4016        | 0.1786        | 22.0375        | 0.6708        | 0.4107        | 0.1829        |
|               | Deblur-NeRF [2]     | 19.4655        | 0.4512        | 0.4144        | 0.2658        | 19.5910        | 0.4559        | 0.4142        | 0.2632        |
|               | LensNeRF-D (ours)   | <u>22.3944</u> | <b>0.6924</b> | <b>0.3589</b> | <u>0.1620</u> | <b>22.6566</b> | <b>0.7036</b> | <b>0.3476</b> | <b>0.1441</b> |
|               | LensNeRF-M (ours)   | <b>22.4682</b> | <u>0.6903</u> | <u>0.3656</u> | <b>0.1607</b> | <u>22.5173</u> | <u>0.7010</u> | <u>0.3537</u> | <u>0.1488</u> |
|               | LensNeRF-S (ours)   | 22.3810        | 0.6847        | 0.3745        | 0.1682        | 22.4521        | 0.6949        | 0.3650        | 0.1541        |

Table 11. Quantitative result for each scene on deblur task. The F-number of the train images is denoted on the left side of the arrow, and the F-number of the target images is indicated on the right. The **best** results are in boldface, and the second-best results are underlined.

| Scene         | Method            | PSNR $\uparrow$ | SSIM $\uparrow$<br>F4 $\rightarrow$ F4 | LPIPS $\downarrow$ | PSNR $\uparrow$<br>F5.6 $\rightarrow$ F5.6 | SSIM $\uparrow$ | LPIPS $\downarrow$ |
|---------------|-------------------|-----------------|----------------------------------------|--------------------|--------------------------------------------|-----------------|--------------------|
| AmusementPark | DVGO [7]          | 28.9877         | 0.8995                                 | 0.1943             | 29.3536                                    | 0.9044          | 0.1780             |
|               | LensNeRF-D (ours) | <u>30.2320</u>  | <u>0.9316</u>                          | <b>0.1420</b>      | <u>28.7988</u>                             | <u>0.9285</u>   | <b>0.1377</b>      |
|               | LensNeRF-M (ours) | <b>30.5307</b>  | <b>0.9329</b>                          | <u>0.1454</u>      | <b>30.3660</b>                             | <b>0.9318</b>   | <u>0.1413</u>      |
|               | LensNeRF-S (ours) | 29.7200         | 0.9283                                 | 0.1544             | 28.5335                                    | 0.9246          | 0.1509             |
| AppleMint     | DVGO [7]          | <b>36.1986</b>  | 0.9334                                 | 0.1761             | <b>35.9373</b>                             | 0.9270          | 0.1699             |
|               | LensNeRF-D (ours) | <u>34.7835</u>  | <b>0.9401</b>                          | <b>0.1693</b>      | 34.7055                                    | <u>0.9342</u>   | <b>0.1632</b>      |
|               | LensNeRF-M (ours) | 33.6269         | <u>0.9380</u>                          | 0.1728             | <u>34.7507</u>                             | <b>0.9343</b>   | 0.1640             |
|               | LensNeRF-S (ours) | 32.6642         | 0.9321                                 | <u>0.1711</u>      | 33.7557                                    | 0.9296          | <u>0.1636</u>      |
| Bear          | DVGO [7]          | 30.9147         | 0.8608                                 | 0.3384             | 30.6581                                    | 0.8409          | 0.3579             |
|               | LensNeRF-D (ours) | <b>32.4768</b>  | <b>0.8767</b>                          | <b>0.3214</b>      | <b>32.0588</b>                             | <b>0.8564</b>   | <b>0.3373</b>      |
|               | LensNeRF-M (ours) | 31.6488         | <u>0.8763</u>                          | <u>0.3215</u>      | <u>31.3990</u>                             | <u>0.8554</u>   | <u>0.3416</u>      |
|               | LensNeRF-S (ours) | 29.6380         | 0.8700                                 | 0.3232             | 30.1461                                    | 0.8508          | 0.3439             |
| BoyAndGirl    | DVGO [7]          | 33.0087         | 0.9291                                 | 0.1754             | <b>33.0253</b>                             | 0.9271          | 0.1614             |
|               | LensNeRF-D (ours) | 33.9178         | <u>0.9506</u>                          | <b>0.1447</b>      | 31.4763                                    | <u>0.9459</u>   | <b>0.1328</b>      |
|               | LensNeRF-M (ours) | <b>34.6582</b>  | <b>0.9514</b>                          | <u>0.1460</u>      | <u>32.0842</u>                             | <b>0.9481</b>   | <u>0.1339</u>      |
|               | LensNeRF-S (ours) | <u>34.4109</u>  | 0.9478                                 | 0.1490             | 31.7902                                    | 0.9433          | 0.1414             |
| Chrysanthemum | DVGO [7]          | 30.5700         | 0.8821                                 | 0.2181             | <u>30.2862</u>                             | 0.8712          | 0.2112             |
|               | LensNeRF-D (ours) | <b>31.5985</b>  | <b>0.9022</b>                          | <b>0.1863</b>      | 30.2057                                    | <u>0.8881</u>   | <b>0.1865</b>      |
|               | LensNeRF-M (ours) | 29.0257         | <u>0.8969</u>                          | <u>0.1887</u>      | <b>30.2883</b>                             | <b>0.8868</b>   | <u>0.1893</u>      |
|               | LensNeRF-S (ours) | <u>30.3991</u>  | 0.8899                                 | 0.1988             | 29.9367                                    | 0.8785          | 0.2013             |
| Gink          | DVGO [7]          | 27.0991         | 0.8974                                 | 0.1845             | 27.6730                                    | 0.8997          | 0.1691             |
|               | LensNeRF-D (ours) | <b>28.4802</b>  | <b>0.9248</b>                          | <b>0.1421</b>      | <b>28.4980</b>                             | <b>0.9188</b>   | <b>0.1413</b>      |
|               | LensNeRF-M (ours) | <u>28.0098</u>  | <u>0.9214</u>                          | <u>0.1446</u>      | <u>28.4343</u>                             | <u>0.9172</u>   | <u>0.1436</u>      |
|               | LensNeRF-S (ours) | 27.3524         | 0.9147                                 | 0.1547             | 27.1320                                    | 0.9074          | 0.1556             |
| Sheep         | DVGO [7]          | 28.2883         | 0.8668                                 | 0.4004             | 28.8608                                    | 0.8649          | 0.3827             |
|               | LensNeRF-D (ours) | <b>29.3843</b>  | <b>0.8969</b>                          | <b>0.3337</b>      | 29.1469                                    | <b>0.8883</b>   | <b>0.3346</b>      |
|               | LensNeRF-M (ours) | <u>29.3404</u>  | <u>0.8948</u>                          | <u>0.3358</u>      | <u>29.2367</u>                             | <u>0.8872</u>   | <u>0.3370</u>      |
|               | LensNeRF-S (ours) | 28.8323         | 0.8887                                 | 0.3480             | <b>29.4681</b>                             | 0.8815          | 0.3461             |
| Snowman       | DVGO [7]          | 23.1324         | 0.7656                                 | 0.4320             | 23.2311                                    | 0.7443          | 0.4507             |
|               | LensNeRF-D (ours) | <b>25.0261</b>  | <b>0.7931</b>                          | <b>0.3813</b>      | <b>24.3356</b>                             | <b>0.7686</b>   | <b>0.4036</b>      |
|               | LensNeRF-M (ours) | <u>24.7963</u>  | <u>0.7904</u>                          | <u>0.3817</u>      | <u>23.7217</u>                             | <u>0.7630</u>   | <u>0.4047</u>      |
|               | LensNeRF-S (ours) | 24.4192         | 0.7846                                 | 0.3915             | 23.4501                                    | 0.7581          | 0.4116             |
| Xmas          | DVGO [7]          | 24.7823         | 0.8033                                 | 0.3511             | 24.1902                                    | 0.7834          | 0.3384             |
|               | LensNeRF-D (ours) | <u>25.1673</u>  | <b>0.8401</b>                          | <b>0.3037</b>      | <b>24.7233</b>                             | <b>0.8218</b>   | <b>0.2979</b>      |
|               | LensNeRF-M (ours) | 24.8679         | 0.8373                                 | <u>0.3101</u>      | <u>24.6237</u>                             | <u>0.8164</u>   | <u>0.3054</u>      |
|               | LensNeRF-S (ours) | <b>25.3955</b>  | <u>0.8374</u>                          | 0.3167             | 24.3595                                    | 0.8072          | 0.3194             |

Table 12. Quantitative results for each scene when the train images and the test images have identical F-number. The F-number of the train images is denoted on the left side of the arrow, and the F-number of the target images is indicated on the right. The **best** results are in boldface, and the second-best results are underlined.

| Scene         | Method            | PSNR $\uparrow$ | SSIM $\uparrow$<br>F8 $\rightarrow$ F8 | LPIPS $\downarrow$ | PSNR $\uparrow$ | SSIM $\uparrow$<br>F22 $\rightarrow$ F22 | LPIPS $\downarrow$ |
|---------------|-------------------|-----------------|----------------------------------------|--------------------|-----------------|------------------------------------------|--------------------|
| AmusementPark | DVGO [7]          | 29.6689         | 0.9066                                 | 0.1682             | 30.0489         | 0.8994                                   | 0.1746             |
|               | LensNeRF-D (ours) | <u>29.9317</u>  | <b>0.9262</b>                          | <b>0.1386</b>      | <b>30.5479</b>  | <b>0.9123</b>                            | <b>0.1480</b>      |
|               | LensNeRF-M (ours) | 28.6188         | 0.9178                                 | <u>0.1467</u>      | 29.7249         | 0.9073                                   | <u>0.1524</u>      |
|               | LensNeRF-S (ours) | <b>30.3037</b>  | <u>0.9225</u>                          | 0.1523             | <u>30.4876</u>  | <u>0.9085</u>                            | 0.1554             |
| AppleMint     | DVGO [7]          | <b>35.1123</b>  | 0.9201                                 | 0.1692             | <b>34.4317</b>  | 0.9060                                   | 0.1983             |
|               | LensNeRF-D (ours) | 33.2631         | <u>0.9265</u>                          | <u>0.1655</u>      | <u>33.7055</u>  | <b>0.9145</b>                            | <b>0.1788</b>      |
|               | LensNeRF-M (ours) | <u>33.8426</u>  | <b>0.9280</b>                          | <b>0.1632</b>      | 32.9038         | <u>0.9120</u>                            | <u>0.1809</u>      |
|               | LensNeRF-S (ours) | 32.1758         | 0.9225                                 | 0.1682             | 32.6651         | 0.9087                                   | 0.1839             |
| Bear          | DVGO [7]          | 30.3196         | 0.8234                                 | 0.3748             | <u>29.5623</u>  | 0.8031                                   | 0.4090             |
|               | LensNeRF-D (ours) | <b>30.8108</b>  | <b>0.8364</b>                          | <b>0.3602</b>      | <b>30.1386</b>  | <b>0.8149</b>                            | <b>0.3894</b>      |
|               | LensNeRF-M (ours) | 29.5448         | <u>0.8345</u>                          | <u>0.3615</u>      | 28.5868         | <u>0.8092</u>                            | <u>0.3977</u>      |
|               | LensNeRF-S (ours) | 29.2065         | 0.8300                                 | 0.3680             | 28.3721         | 0.8049                                   | 0.4041             |
| BoyAndGirl    | DVGO [7]          | 33.0075         | 0.9246                                 | 0.1584             | <u>31.7103</u>  | 0.8888                                   | 0.2114             |
|               | LensNeRF-D (ours) | <b>33.3078</b>  | <b>0.9441</b>                          | 0.1336             | 31.2961         | <u>0.9054</u>                            | <b>0.1773</b>      |
|               | LensNeRF-M (ours) | 31.8228         | 0.9434                                 | <b>0.1335</b>      | <b>32.4859</b>  | <b>0.9076</b>                            | <u>0.1787</u>      |
|               | LensNeRF-S (ours) | 31.6523         | 0.9394                                 | 0.1418             | 31.3252         | 0.9033                                   | 0.1801             |
| Chrysanthemum | DVGO [7]          | 29.9292         | 0.8594                                 | 0.2080             | <b>29.2169</b>  | 0.8250                                   | 0.2328             |
|               | LensNeRF-D (ours) | <b>30.3027</b>  | <b>0.8744</b>                          | <b>0.1921</b>      | 27.5880         | <b>0.8316</b>                            | <b>0.2032</b>      |
|               | LensNeRF-M (ours) | <u>30.2810</u>  | <u>0.8735</u>                          | <u>0.1940</u>      | <u>27.5973</u>  | <u>0.8315</u>                            | <u>0.2086</u>      |
|               | LensNeRF-S (ours) | 29.7214         | 0.8644                                 | 0.2073             | 26.7848         | 0.8226                                   | 0.2147             |
| Gink          | DVGO [7]          | <u>27.8355</u>  | 0.8955                                 | 0.1632             | <u>27.4917</u>  | 0.8691                                   | 0.1947             |
|               | LensNeRF-D (ours) | <b>27.9629</b>  | <b>0.9081</b>                          | <b>0.1492</b>      | <b>27.8150</b>  | <b>0.8762</b>                            | <b>0.1744</b>      |
|               | LensNeRF-M (ours) | 27.7914         | <u>0.9073</u>                          | <u>0.1495</u>      | 27.1873         | <u>0.8698</u>                            | <u>0.1791</u>      |
|               | LensNeRF-S (ours) | 27.2479         | 0.8979                                 | 0.1639             | 26.2656         | 0.8587                                   | 0.1864             |
| Sheep         | DVGO [7]          | <b>29.2461</b>  | 0.8640                                 | 0.3705             | <b>28.8904</b>  | <b>0.8524</b>                            | 0.3446             |
|               | LensNeRF-D (ours) | 28.4339         | <b>0.8778</b>                          | <b>0.3390</b>      | <u>26.4151</u>  | <u>0.8501</u>                            | <b>0.3252</b>      |
|               | LensNeRF-M (ours) | <u>28.9944</u>  | <u>0.8775</u>                          | <u>0.3450</u>      | 26.1083         | 0.8479                                   | <u>0.3323</u>      |
|               | LensNeRF-S (ours) | 28.7054         | 0.8736                                 | 0.3533             | 26.6508         | 0.8470                                   | 0.3356             |
| Snowman       | DVGO [7]          | 23.4141         | 0.7246                                 | 0.4618             | <b>23.8170</b>  | 0.6955                                   | 0.4816             |
|               | LensNeRF-D (ours) | <b>24.1798</b>  | <b>0.7449</b>                          | <b>0.4262</b>      | <u>23.0085</u>  | <b>0.7030</b>                            | <b>0.4558</b>      |
|               | LensNeRF-M (ours) | <u>23.5818</u>  | <u>0.7409</u>                          | 0.4327             | 22.8233         | <u>0.6972</u>                            | <u>0.4624</u>      |
|               | LensNeRF-S (ours) | 23.5794         | <u>0.7376</u>                          | <u>0.4297</u>      | 22.9582         | 0.6924                                   | 0.4625             |
| Xmas          | DVGO [7]          | 23.6573         | 0.7619                                 | 0.3342             | 22.4655         | 0.7004                                   | 0.3683             |
|               | LensNeRF-D (ours) | <b>24.2313</b>  | <b>0.7971</b>                          | <b>0.3079</b>      | <b>22.7910</b>  | <u>0.7209</u>                            | <b>0.3276</b>      |
|               | LensNeRF-M (ours) | 24.1292         | 0.7934                                 | 0.3119             | <u>22.7370</u>  | <b>0.7215</b>                            | <u>0.3300</u>      |
|               | LensNeRF-S (ours) | 24.0314         | 0.7869                                 | 0.3244             | 22.6395         | 0.7128                                   | 0.3419             |

Table 13. Quantitative results for each scene when the train images and the test images have identical F-number. The F-number of the train images is denoted on the left side of the arrow, and the F-number of the target images is indicated on the right. The **best** results are in boldface, and the second-best results are underlined.



## References

- [1] The shortest distance between two rays in 3d. <https://math.stackexchange.com/questions/1036959/midpoint-of-the-shortest-distance-between-2-rays-in-3d>. 1
- [2] Li Ma, Xiaoyu Li, Jing Liao, Qi Zhang, Xuan Wang, Jue Wang, and Pedro V. Sander. Deblur-nerf: Neural radiance fields from blurry images. *arXiv preprint arXiv:2111.14292*, 2021. 4, 11, 12
- [3] Ben Mildenhall, Peter Hedman, Ricardo Martin-Brualla, Pratul P. Srinivasan, and Jonathan T. Barron. NeRF in the dark: High dynamic range view synthesis from noisy raw images. *Proceedings of the IEEE/CVF International Conference on Computer Vision*, 2022. 1
- [4] Ben Mildenhall, Pratul P Srinivasan, Matthew Tancik, Jonathan T Barron, Ravi Ramamoorthi, and Ren Ng. Nerf: Representing scenes as neural radiance fields for view synthesis. In *European conference on computer vision*, pages 405–421. Springer, 2020. 1
- [5] Hyeongseok Son, Junyong Lee, Sunghyun Cho, and Seungyong Lee. Single image defocus deblurring using kernel-sharing parallel atrous convolutions. In *Proceedings of the IEEE/CVF International Conference on Computer Vision*, pages 2642–2650, 2021. 11, 12
- [6] Pratul P Srinivasan, Rahul Garg, Neal Wadhwa, Ren Ng, and Jonathan T Barron. Aperture supervision for monocular depth estimation. *Proceedings of the IEEE/CVF Conference on Computer Vision and Pattern Recognition*, 2018. 1
- [7] Cheng Sun, Min Sun, and Hwann-Tzong Chen. Direct voxel grid optimization: Super-fast convergence for radiance fields reconstruction. In *Proceedings of the IEEE/CVF Conference on Computer Vision and Pattern Recognition*, pages 5459–5469, 2022. 9, 10, 11, 12, 13, 14
- [8] Yinhuai Wang, Shuzhou Yang, Yujie Hu, and Jian Zhang. Nerfocus: Neural radiance field for 3d synthetic defocus. *arXiv preprint arXiv:2203.05189*, 2022. 2, 4, 9, 10
- [9] Zijin Wu, Xingyi Li, Juewen Peng, Hao Lu, Zhiguo Cao, and Weicai Zhong. Dof-nerf: Depth-of-field meets neural radiance fields. In *Proceedings of the 30th ACM International Conference on Multimedia*, pages 1718–1729, 2022. 2, 4
